# Supplementary material
Source: Springer Nature journal article supplement (https://www.springermedizin.de/resource/supplementary/12885_2011_2918_MOESM1_ESM.pdf/9462298)
Supplement: MOESM1 [file 9462298]

Invited population, age 50  
n=2841

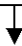

Participants at baseline, age 50  
n=2322

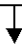

Participants with baseline Se  
measurement, age 50  
n= 2045

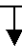

Participants with genotyping  
results, age 71  
n=1005  
Prostate Cancer n=126

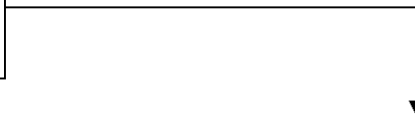

Participants with baseline Se measurements at age  
50 deceased before age 71 or non-participants at age  
71 or without genotyping results, at age 71  
n=1040; Prostate cancer n= 82
